# Supplementary material for: Health-related quality of life in parents of long-term childhood cancer survivors: a report from the Swiss Childhood Cancer Survivor Study - Parents
Source: bioRxiv or medRxiv preprint supplement (doi:10.1101/2024.10.28.24316262), 2024-10-29
Supplement: Supplementary file [file media-1.pdf]

## Supplementary Material

**Table S1**

Comparison of survivor characteristics with participating (*n* = 493) and non-participating (*n* = 734) parents.

|                                          | Survivors with<br>participating parents<br>( <i>n</i> = 493) | Survivors with non-<br>participating parents<br>( <i>n</i> = 734) |                                    |
|------------------------------------------|--------------------------------------------------------------|-------------------------------------------------------------------|------------------------------------|
|                                          | <i>n</i> (%)                                                 | <i>n</i> (%)                                                      | <i>p</i> value <sup>b</sup>        |
| <i>Study aim</i>                         |                                                              |                                                                   | <0.001                             |
| Cancer-related study<br>aim              | 296 (60.0)                                                   | 310 (42.2)                                                        |                                    |
| Well-being study aim                     | 197 (40.0)                                                   | 424 (57.8)                                                        |                                    |
| <b>Socio-demographic characteristics</b> |                                                              |                                                                   |                                    |
| <i>Survivors' sex</i>                    |                                                              |                                                                   | 0.636                              |
| Male                                     | 272 (55.2)                                                   | 415 (56.5)                                                        |                                    |
| Female                                   | 221 (44.8)                                                   | 319 (43.5)                                                        |                                    |
| <i>Survivors' age at study</i>           |                                                              |                                                                   | 0.065                              |
| <30 years                                | 209 (42.4)                                                   | 298 (40.6)                                                        |                                    |
| 30-<40 years                             | 218 (44.2)                                                   | 301 (41.0)                                                        |                                    |
| >=40 years                               | 66 (13.4)                                                    | 135 (18.4)                                                        |                                    |
|                                          | <b>Mean (SD)</b>                                             | <b>Mean (SD)</b>                                                  | <b><i>p</i> value <sup>b</sup></b> |
| <i>Survivors' age at study (years)</i>   | 32 (6.2)                                                     | 33 (6.8)                                                          | 0.113                              |
| <b>Cancer-related characteristics</b>    |                                                              |                                                                   |                                    |
|                                          | <b><i>n</i> (%)</b>                                          | <b><i>n</i> (%)</b>                                               | <b><i>p</i> value <sup>b</sup></b> |
| <i>Age at diagnosis</i>                  |                                                              |                                                                   | 0.400                              |
| <5 years                                 | 188 (38.1)                                                   | 270 (36.8)                                                        |                                    |
| 5-<10 years                              | 143 (29.0)                                                   | 196 (26.7)                                                        |                                    |
| >=10 years                               | 162 (32.9)                                                   | 268 (36.5)                                                        |                                    |
| <i>Time since diagnosis</i>              |                                                              |                                                                   | 0.232                              |
| <20 years                                | 140 (28.4)                                                   | 190 (25.9)                                                        |                                    |
| 20-<25 years                             | 125 (25.4)                                                   | 210 (28.6)                                                        |                                    |
| 25-<30 years                             | 121 (24.5)                                                   | 155 (21.1)                                                        |                                    |
| >=30 years                               | 107 (21.7)                                                   | 179 (24.4)                                                        |                                    |
| <i>Diagnosis (ICCC-3)</i>                |                                                              |                                                                   | 0.803                              |
| Leukemia                                 | 167 (33.9)                                                   | 248 (33.8)                                                        |                                    |
| Lymphoma                                 | 84 (17.0)                                                    | 133 (18.1)                                                        |                                    |
| CNS tumor                                | 68 (13.8)                                                    | 109 (14.9)                                                        |                                    |
| Neuroblastoma                            | 18 (3.7)                                                     | 37 (5.0)                                                          |                                    |

|                                     |                  |                  |                             |
|-------------------------------------|------------------|------------------|-----------------------------|
| Retinoblastoma                      | 14 (2.8)         | 13 (1.8)         |                             |
| Renal tumor                         | 33 (6.7)         | 50 (6.8)         |                             |
| Hepatic tumor                       | 6 (1.2)          | 4 (0.5)          |                             |
| Bone tumor                          | 29 (5.9)         | 33 (4.5)         |                             |
| Soft tissue sarcoma                 | 33 (6.7)         | 46 (6.3)         |                             |
| Germ cell tumor                     | 17 (3.4)         | 27 (3.7)         |                             |
| LCH                                 | 24 (4.9)         | 34 (4.6)         |                             |
| <i>Therapy</i> <sup>a</sup>         |                  |                  | 0.178                       |
| Surgery only                        | 64 (13.0)        | 90 (12.3)        |                             |
| <i>Chemotherapy</i>                 | 263 (53.3)       | 358 (48.8)       |                             |
| Radiotherapy                        | 139 (28.2)       | 249 (33.9)       |                             |
| SCT                                 | 26 (5.3)         | 32 (4.4)         |                             |
| <i>Relapse</i>                      |                  |                  | 0.402                       |
| No                                  | 432 (87.6)       | 631 (86.0)       |                             |
| Yes                                 | 61 (12.4)        | 103 (14.0)       |                             |
|                                     | <b>Mean (SD)</b> | <b>Mean (SD)</b> | <b>p value</b> <sup>b</sup> |
| <i>Age at diagnosis (years)</i>     | 7 (4.5)          | 7 (4.6)          | 0.578                       |
| <i>Time since diagnosis (years)</i> | 24 (6.8)         | 24 (7.0)         | 0.292                       |

*Note.* CNS, central nervous system; LCH, Langerhans cell histiocytosis; SCT, stem cell transplantation; SD, standard deviation

<sup>a</sup> Missing values; percentages are based on the total number of participants

<sup>b</sup> p value calculated from Chi-square test statistics (categorical variables) or t test statistics (continuous variables) comparing survivors of participating and non-participating parents.

**Table S2**

Comparison of HRQOL between parents of childhood cancer survivors (CCS parents; n = 751) and parents from the general population (comparison parents; n = 454) and separately for mothers and fathers for the physical and mental HRQOL summary measures and the health domain scales and corresponding p values.

| <b>Difference between CCS parents (n = 751) and comparison parents (n = 454) <sup>a</sup></b> |                   |                          |                |
|-----------------------------------------------------------------------------------------------|-------------------|--------------------------|----------------|
|                                                                                               | <b>Difference</b> | <b>95% CI difference</b> | <b>p value</b> |
| <b>Scale</b>                                                                                  |                   |                          |                |
| Physical functioning                                                                          | 1.37              | (-1.01, 3.76)            | 0.259          |
| Physical role functioning                                                                     | -0.41             | (-3.01, 2.18)            | 0.755          |
| Bodily pain                                                                                   | 1.17              | (-1.97, 4.30)            | 0.465          |
| General health perceptions                                                                    | 1.51              | (-0.61, 3.62)            | 0.163          |
| Vitality                                                                                      | 1.09              | (-1.15, 3.34)            | 0.340          |
| Social role functioning                                                                       | -0.26             | (-2.64, 2.12)            | 0.831          |
| Emotional role functioning                                                                    | -0.85             | (-3.18, 1.47)            | 0.472          |
| Mental health                                                                                 | 0.56              | (-1.44, 2.55)            | 0.583          |
| <b>Summary measure</b>                                                                        |                   |                          |                |
| Physical HRQOL                                                                                | 0.62              | (-0.56, 1.81)            | 0.300          |
| Mental HRQOL                                                                                  | -0.37             | (-1.56, 0.82)            | 0.545          |

| <b>Difference between CCS mothers (n = 442) and comparison mothers (n = 263) <sup>b</sup></b> |                   |                          |                |
|-----------------------------------------------------------------------------------------------|-------------------|--------------------------|----------------|
|                                                                                               | <b>Difference</b> | <b>95% CI difference</b> | <b>p value</b> |
| <b>Scale</b>                                                                                  |                   |                          |                |
| Physical functioning                                                                          | 2.96              | (0.17, 5.76)             | <b>0.038</b>   |
| Physical role functioning                                                                     | 0.84              | (-2.48, 4.16)            | 0.620          |
| Bodily pain                                                                                   | -0.09             | (-4.11, 3.92)            | 0.964          |
| General health perceptions                                                                    | 1.80              | (-0.79, 4.39)            | 0.173          |
| Vitality                                                                                      | 0.52              | (-2.25, 3.29)            | 0.711          |
| Social role functioning                                                                       | -0.10             | (-3.15, 2.95)            | 0.950          |
| Emotional role functioning                                                                    | -1.27             | (-4.35, 1.81)            | 0.418          |
| Mental health                                                                                 | 0.86              | (-1.65, 3.36)            | 0.503          |
| <b>Summary measure</b>                                                                        |                   |                          |                |
| Physical HRQOL                                                                                | 1.13              | (-0.35, 2.60)            | 0.134          |
| Mental HRQOL                                                                                  | -0.60             | (-2.12, 0.92)            | 0.437          |

| <b>Difference between CCS fathers (n = 309) and comparison fathers (n = 191) <sup>c</sup></b> |                   |                          |                |
|-----------------------------------------------------------------------------------------------|-------------------|--------------------------|----------------|
|                                                                                               | <b>Difference</b> | <b>95% CI difference</b> | <b>p value</b> |
| <b>Scale</b>                                                                                  |                   |                          |                |
| Physical functioning                                                                          | 0.86              | (-2.96, 4.69)            | 0.658          |
| Physical role functioning                                                                     | -0.80             | (-5.24, 3.64)            | 0.724          |
| Bodily pain                                                                                   | 4.40              | (-0.56, 9.35)            | 0.082          |
| General health perceptions                                                                    | 1.44              | (-2.07, 4.96)            | 0.420          |
| Vitality                                                                                      | 1.90              | (-1.38, 5.18)            | 0.255          |

|                            |       |               |       |
|----------------------------|-------|---------------|-------|
| Social role functioning    | -0.11 | (-3.60, 3.38) | 0.951 |
| Emotional role functioning | 0.38  | (-3.07, 3.83) | 0.829 |
| Mental health              | 0.05  | (-2.81, 2.91) | 0.974 |
| <b>Summary measure</b>     |       |               |       |
| Physical HRQOL             | 0.76  | (-1.29, 2.80) | 0.467 |
| Mental HRQOL               | -0.17 | (-1.88, 1.53) | 0.841 |

*Note.* CCS, childhood cancer survivor; CI, confidence interval; HRQOL, health-related quality of life; difference with 95% confidence interval (CI) comparing CCS parents and comparison parents; positive differences indicate better HRQOL in CCS parents and negative differences poorer HRQOL compared to comparison parents; p value for the adjusted difference between the two samples; p values <0.05 are indicated with bold font.

Regression analyses adjusted for

<sup>a</sup> study aim mentioned, number of children, migration background, employment status, partnership, and chronic condition or health problem

<sup>b</sup> study aim mentioned, number of children, migration background, employment status, and chronic condition or health problem

<sup>c</sup> study aim mentioned, number of children, and partnership status

**Table S3**

Multilevel univariable linear regression analysis for physical and mental health-related quality of life (HRQOL) including parents of childhood cancer survivors (CCS parents).

| <i>Characteristics</i>                          | Physical HRQOL (PCS) |                |                      | Mental HRQOL (MCS) |                |                      |
|-------------------------------------------------|----------------------|----------------|----------------------|--------------------|----------------|----------------------|
|                                                 | Coeff                | 95% CI         | p value <sup>b</sup> | Coeff              | 95% CI         | p value <sup>b</sup> |
| <b>Study aim mentioned</b>                      |                      |                | 0.253                |                    |                | <b>0.036</b>         |
| No                                              | Ref                  |                |                      | Ref                |                |                      |
| Yes                                             | 0.89                 | (-0.63, 2.40)  |                      | -1.54              | (-2.99, -0.10) |                      |
| <b><i>Socio-demographic characteristics</i></b> |                      |                |                      |                    |                |                      |
| <b>Sex</b>                                      |                      |                | 0.681                |                    |                | <b>0.006</b>         |
| Fathers                                         | Ref                  |                |                      | Ref                |                |                      |
| Mothers                                         | -0.29                | (-1.65, 1.08)  |                      | -1.55              | (-2.65, -0.44) |                      |
| <b>Age <sup>a</sup></b>                         |                      |                | <b>&lt;0.001</b>     |                    |                | 0.476                |
| 41-65 years                                     | Ref                  |                |                      | Ref                |                |                      |
| 66-75 years                                     | -4.17                | (-5.70, -2.63) |                      | 0.53               | (-0.92, 1.98)  |                      |
| <b>Number of children <sup>a</sup></b>          |                      |                | 0.246                |                    |                | 0.654                |
| 1 child                                         | Ref                  |                |                      | Ref                |                |                      |
| 2 children                                      | 2.03                 | (-2.20, 6.25)  |                      | -1.82              | (-5.70, 2.06)  |                      |
| >2 children                                     | 0.81                 | (-3.41, 5.03)  |                      | -1.65              | (-5.54, 2.24)  |                      |
| <b>Migration background <sup>a</sup></b>        |                      |                | 0.430                |                    |                | <b>&lt;0.001</b>     |
| No                                              | Ref                  |                |                      | Ref                |                |                      |
| Yes                                             | -0.87                | (-3.03, 1.29)  |                      | -3.87              | (-5.82, -1.91) |                      |
| <b>Education <sup>a</sup></b>                   |                      |                | <b>0.046</b>         |                    |                | 0.338                |
| Compulsory schooling                            | -0.53                | (-3.87, 0.82)  |                      | -0.58              | (-2.73, 1.58)  |                      |
| Vocational training                             | Ref                  |                |                      | Ref                |                |                      |
| Upper secondary education                       | 1.86                 | (-0.04, 3.77)  |                      | 0.78               | (-0.93, 2.50)  |                      |
| University education                            | 1.38                 | (-0.67, 3.43)  |                      | 1.43               | (-0.47, 3.33)  |                      |
| <b>Employment <sup>a</sup></b>                  |                      |                | <b>&lt;0.001</b>     |                    |                | 0.171                |
| Employed                                        | Ref                  |                |                      | Ref                |                |                      |
| Unemployed                                      | -3.48                | (-6.01, -0.92) |                      | -2.12              | (-4.38, 0.14)  |                      |

|                                                           |       |                 |                  |       |                |                  |
|-----------------------------------------------------------|-------|-----------------|------------------|-------|----------------|------------------|
| Retired                                                   | -3.76 | (-5.29, -2.23)  |                  | -0.06 | (-1.50, 1.37)  |                  |
| <b>Partnership <sup>a</sup></b>                           |       |                 | <b>0.003</b>     |       |                | 0.108            |
| Yes                                                       | Ref   |                 |                  | Ref   |                |                  |
| No                                                        | -3.59 | (6.00, -1.19)   |                  | -1.81 | (-4.01, 0.40)  |                  |
| <b>Questionnaire language</b>                             |       |                 | <b>&lt;0.001</b> |       |                | <b>&lt;0.001</b> |
| German                                                    | Ref   |                 |                  | Ref   |                |                  |
| French or Italian                                         | -3.32 | (-5.00, -1.63)  |                  | -3.48 | (-5.07, -1.89) |                  |
| <b>Chronic condition or health problem <sup>a</sup></b>   |       |                 | <b>&lt;0.001</b> |       |                | <b>0.011</b>     |
| No                                                        | Ref   |                 |                  | Ref   |                |                  |
| Yes                                                       | -8.61 | (-9.91, -7.32)  |                  | -1.61 | (-2.86, -0.36) |                  |
| <b><i>Cancer-related characteristics</i></b>              |       |                 |                  |       |                |                  |
| <b>Age at diagnosis</b>                                   |       |                 | 0.093            |       |                | 0.543            |
| <5 years                                                  | Ref   |                 |                  | Ref   |                |                  |
| 5-<10 years                                               | -1.95 | (-3.75, -0.159) |                  | -0.11 | (-1.84, 1.62)  |                  |
| >= 10 years                                               | -1.24 | (-3.01, 0.53)   |                  | -0.90 | (-2.59, 0.79)  |                  |
| <b>Time since diagnosis</b>                               |       |                 | <b>0.002</b>     |       |                | 0.921            |
| <20 years                                                 | Ref   |                 |                  | Ref   |                |                  |
| 20-<25 years                                              | -1.80 | (-3.78, 0.19)   |                  | -0.37 | (-2.30, 1.56)  |                  |
| 25-<30 years                                              | -2.72 | (-4.74, -0.71)  |                  | -0.44 | (-2.39, 1.51)  |                  |
| >=30 years                                                | -3.92 | (-6.04, -1.80)  |                  | 0.19  | (-1.85, 2.23)  |                  |
| <b>Cancer diagnosis</b>                                   |       |                 | 0.147            |       |                | 0.808            |
| Leukemia                                                  | Ref   |                 |                  | Ref   |                |                  |
| Lymphoma                                                  | -2.21 | (-4.24, -0.17)  |                  | -0.97 | (-2.91, 0.97)  |                  |
| CNS tumour                                                | -0.98 | (-3.35, 1.40)   |                  | -0.45 | (-2.72, 1.81)  |                  |
| Solid tumour                                              | -0.13 | (-1.98, 1.72)   |                  | -0.49 | (-2.25, 1.28)  |                  |
| <b>Therapy</b>                                            |       |                 | 0.626            |       |                | 0.086            |
| Surgery only                                              | Ref   |                 |                  | Ref   |                |                  |
| Chemotherapy                                              | 0.45  | (-1.82, 2.71)   |                  | 1.69  | (-0.46, 3.84)  |                  |
| Radiotherapy                                              | -0.49 | (-2.97, 1.99)   |                  | -0.24 | (-2.59, 2.11)  |                  |
| SCT                                                       | 1.49  | (-2.38, 5.35)   |                  | 1.91  | (-1.75, 5.56)  |                  |
| <b>Relapse</b>                                            |       |                 | 0.506            |       |                | 0.470            |
| No                                                        | Ref   |                 |                  | Ref   |                |                  |
| Yes                                                       | 0.76  | (-1.49, 3.01)   |                  | -0.79 | (-2.94, 1.35)  |                  |
| <b>Late effects survivor (self-reported) <sup>b</sup></b> |       |                 | <b>0.026</b>     |       |                | <b>0.006</b>     |
| No                                                        | Ref   |                 |                  | Ref   |                |                  |
| Yes                                                       | -2.23 | (-4.13, -0.33)  |                  | -2.09 | (-3.83, -0.35) |                  |

---

|              |       |               |      |               |
|--------------|-------|---------------|------|---------------|
| Not assessed | -2.01 | (-3.72, 0.31) | 0.69 | (-0.92, 2.31) |
|--------------|-------|---------------|------|---------------|

---

*Note.* HRQOL, health-related quality of life; PCS, physical component summary; MCS, mental component summary; n, number; Coeff, coefficient; CI, confidence interval; Ref, reference category  
p values <0.05 are indicated with bold font.

<sup>a</sup> Missing values

<sup>b</sup> p values calculated from Wald tests

**Table S4**

Multilevel multivariable linear regression analyses for physical and mental health-related quality of life (HRQOL) including parents of childhood cancer survivors (CCS parents).

| Characteristics                          | Physical HRQOL (PCS)<br>(n parents = 657,<br>n groups = 453) |               |                      | Mental HRQOL (MCS)<br>(n parents = 695,<br>n groups = 471) |                |                      |
|------------------------------------------|--------------------------------------------------------------|---------------|----------------------|------------------------------------------------------------|----------------|----------------------|
|                                          | Coeff                                                        | 95% CI        | p value <sup>c</sup> | Coeff                                                      | 95% CI         | p value <sup>c</sup> |
| <b>Study aim mentioned <sup>a</sup></b>  |                                                              |               | -                    |                                                            |                | -                    |
| No                                       | -                                                            | -             |                      | -                                                          | -              |                      |
| Yes                                      | -                                                            | -             |                      | -                                                          | -              |                      |
| <b>Sex</b>                               |                                                              |               | -                    |                                                            |                | <b>0.002</b>         |
| Fathers                                  | -                                                            | -             |                      | Ref                                                        |                |                      |
| Mothers                                  | -                                                            | -             |                      | -1.80                                                      | (-2.93, -0.66) |                      |
| <b>Age <sup>b</sup></b>                  |                                                              |               | 0.160                |                                                            |                | -                    |
| 41-65 years                              | Ref                                                          |               |                      | -                                                          | -              |                      |
| 66-75 years                              | -1.43                                                        | (-3.43, 0.56) |                      | -                                                          | -              |                      |
| <b>Migration background <sup>b</sup></b> |                                                              |               | -                    |                                                            |                | <b>0.000</b>         |
| No                                       | -                                                            | -             |                      | Ref                                                        |                |                      |
| Yes                                      | -                                                            | -             |                      | -3.88                                                      | (-5.79, -1.97) |                      |
| <b>Education <sup>b</sup></b>            |                                                              |               | <b>0.012</b>         |                                                            |                | -                    |
| Compulsory schooling                     | -1.23                                                        | (-3.38, 0.92) |                      | -                                                          | -              |                      |
| Vocational training                      | Ref                                                          |               |                      | -                                                          | -              |                      |
| Upper secondary education                | 2.01                                                         | (0.32, 3.71)  |                      | -                                                          | -              |                      |
| University education                     | 1.79                                                         | (-0.04, 3.62) |                      | -                                                          | -              |                      |
| <b>Employment <sup>b</sup></b>           |                                                              |               | <b>0.000</b>         |                                                            |                | -                    |
| Employed                                 | Ref                                                          |               |                      | -                                                          | -              |                      |
| Unemployed                               | -2.23                                                        | (-4.57, 0.12) |                      | -                                                          | -              |                      |
| Retired                                  | -1.55                                                        | (-3.49, 0.39) |                      | -                                                          | -              |                      |
| <b>Partnership <sup>b</sup></b>          |                                                              |               | <b>0.116</b>         |                                                            |                | -                    |
| Yes                                      | Ref                                                          |               |                      | -                                                          | -              |                      |
| No                                       | -1.72                                                        | (-3.87, 0.43) |                      | -                                                          | -              |                      |
| <b>Questionnaire language</b>            |                                                              |               | <b>0.000</b>         |                                                            |                | <b>0.001</b>         |



|                                                          |       |                |              |       |                |              |
|----------------------------------------------------------|-------|----------------|--------------|-------|----------------|--------------|
| German                                                   | Ref   |                |              | Ref   |                |              |
| French or Italian                                        | -2.91 | (-4.44, -1.38) |              | -2.75 | (-4.36, -1.15) |              |
| <b>Chronic condition or health problem<sup>b</sup></b>   |       |                | <b>0.000</b> |       |                | <b>0.006</b> |
| No                                                       | Ref   |                |              | Ref   |                |              |
| Yes                                                      | -8.26 | (-9.56, -6.96) |              | -1.76 | (-3.02, -0.51) |              |
| <b>Time since diagnosis</b>                              |       |                | <b>0.585</b> |       |                |              |
| <20 years                                                | Ref   |                |              |       |                |              |
| 20-<25 years                                             | -1.21 | (-2.96, 0.54)  |              |       |                |              |
| 25-<30 years                                             | -0.68 | (-2.56, 1.19)  |              |       |                |              |
| >=30 years                                               | -0.41 | (-2.48, 1.67)  |              |       |                |              |
| <b>Late effects survivor (self-reported)<sup>b</sup></b> |       |                | <b>0.057</b> |       |                | <b>0.029</b> |
| No                                                       | Ref   |                |              | Ref   |                |              |
| Yes                                                      | -1.09 | (-2.83, 0.64)  |              | -1.27 | (-3.03, 0.48)  |              |
| Not assessed                                             | -1.81 | (-3.30, -0.33) |              | 1.09  | (-0.49, 2.67)  |              |

*Note.* HRQOL, health-related quality of life; PCS, physical component summary; MCS, mental component summary; n, number; Coeff, coefficient; CI, confidence interval; Ref, reference category

p values <0.05 are indicated with bold font.

<sup>a</sup> Excluded in multivariable regression analysis due to its correlation with late effects

<sup>b</sup> Missing values

<sup>c</sup> p values calculated from Wald tests
